# Supplementary material for: Carbazole–dansyl conjugate for latent fingerprint visualization and on-site detection of date rape drugs
Source: Royal Society of Chemistry journal article supplement (doi:10.1039/d5an00675a), 2025-01-01
Supplement: d5an00675a1.pdf [file d5an00675a1.pdf]

## Carbazole-Dansyl Conjugate for Latent Fingerprint Visualization and *On-Site* Detection of Date Rape Drugs

Meghana Sharma<sup>a</sup>, Shagun<sup>a</sup>, Anish Chhillar<sup>b</sup>, Amit Jaiswal<sup>\*b</sup>, Abhimanew Dhir<sup>\*a</sup>

<sup>a</sup> School of Chemical Sciences, Indian Institute of Technology, Mandi, Himachal Pradesh 175005, India

<sup>b</sup> School of Biosciences and Bioengineering, Indian Institute of Technology, Mandi, Himachal Pradesh 175005, India

### (Supplementary Information)

#### Index

- S3 HR-MS of **DASH**.
- S3 <sup>1</sup>H NMR spectrum of **DASH** in CDCl<sub>3</sub>.
- S4 <sup>13</sup>C NMR spectrum of **DASH** in CDCl<sub>3</sub>.
- S4 FTIR spectrum of **DASH**.
- S5 Fluorescence spectra of **DASH** (5.0 mM) in different solvents.
- S5 Photographs of **DASH** (5.0 mM) dissolved in various solvents.
- S5 Fluorescence spectra of **DASH** in 0 to 90% H<sub>2</sub>O fraction mixture with MeOH.
- S6 Images of the compound **DASH** in 0 to 90% H<sub>2</sub>O fraction mixture with MeOH under 365 nm UV illumination.
- S6 DLS images of **DASH** in **a)** 100% MeOH; **b)** H<sub>2</sub>O:MeOH (90:10).
- S6 SEM images of **DASH** in **a)** 100% MeOH **b)** H<sub>2</sub>O:MeOH (90:10).
- S7 Quantum yield experiment.
- S8 <sup>1</sup>H NMR spectra of **DASH** upon interaction with drugs.
- S8 Calibration plot of GBL to find Limit of Detection (LOD).
- S9 Calibration plot of GVL to find Limit of Detection (LOD).
- S9 Images of Natural fingerprint (in the absence of sebaceous mark) dusted with **10%DASH@SiO<sub>2</sub>** on different substrates.
- S9 SEM images of fingerprint and fingerprint dusted with **10%DASH@SiO<sub>2</sub>**.
- S10 SEM images of Natural fingerprint (in the absence of sebaceous mark) and fingerprint dusted with **10%DASH@SiO<sub>2</sub>**.
- S10 Optical microscope images of fingerprint and fingerprint dusted with **10%DASH@SiO<sub>2</sub>**.

- S10 Confocal microscope images of fingerprint and fingerprint dusted with **10%DASH@SiO<sub>2</sub>**.
- S11 Comparison of Black magnetic powder and **10%DASH@SiO<sub>2</sub>**.
- S11 Comparison of Pyrene, 1,8 naphthalimide, Anthracene and **10%DASH@SiO<sub>2</sub>**.
- S12 Effect of **10%DASH@SiO<sub>2</sub>** on moisture laden and thermally exposed (80 °C) LFPs.
- S12 Depletion series of Natural fingerprints (in the absence of sebaceous mark).
- S12 Ageing experiment.

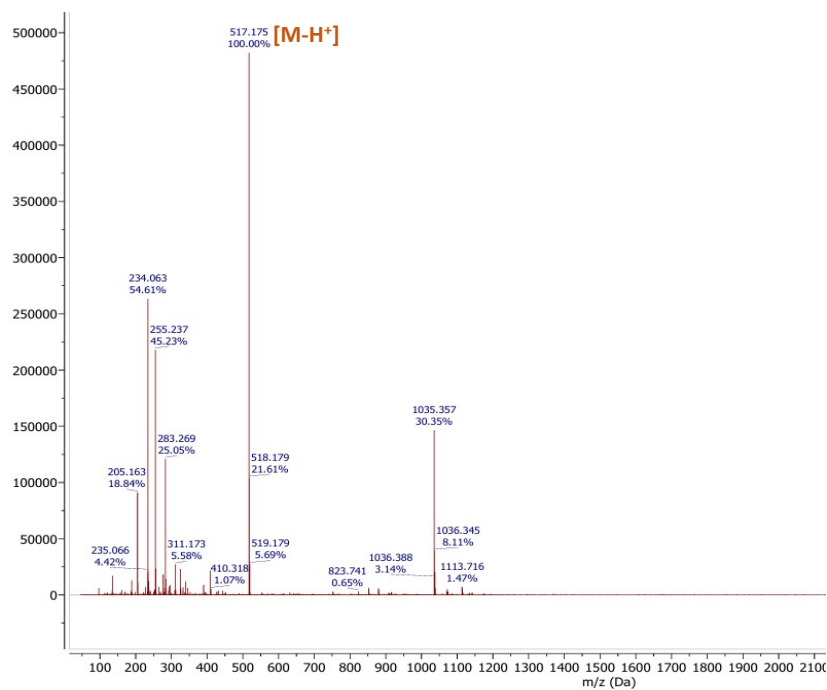

**Fig. S1: HR-MS of DASH.**

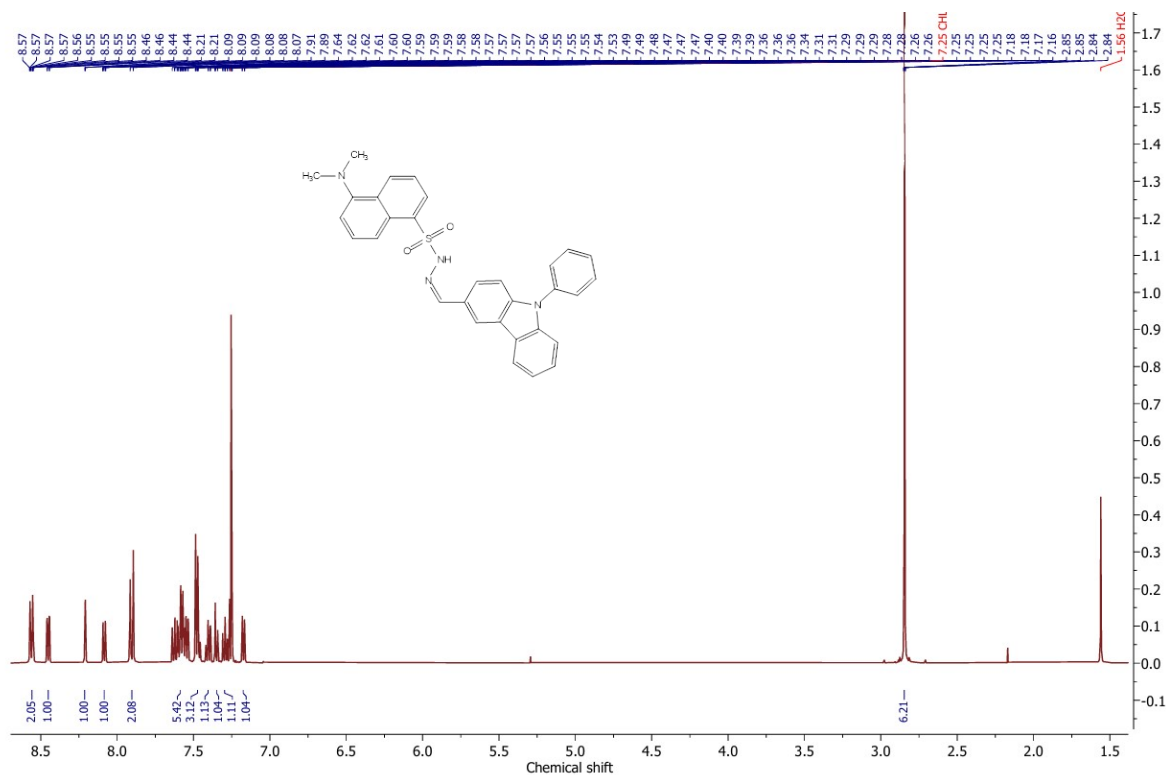

**Fig. S2: <sup>1</sup>H NMR spectrum of DASH in CDCl<sub>3</sub>.**

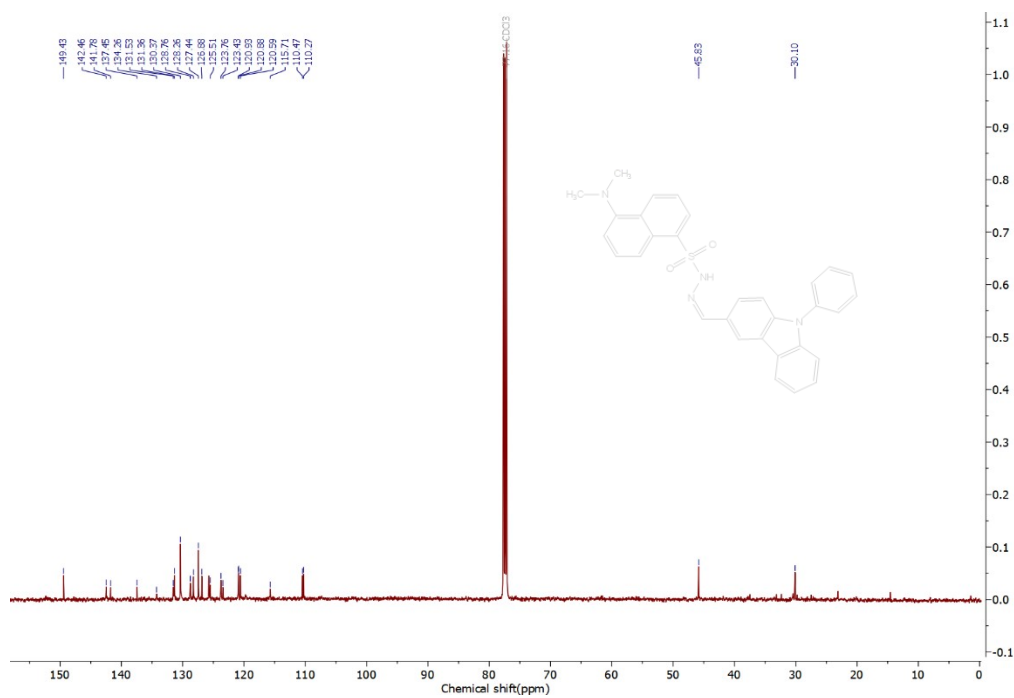

Fig. S3:  $^{13}\text{C}$  NMR spectrum of **DASH** in  $\text{CDCl}_3$ .

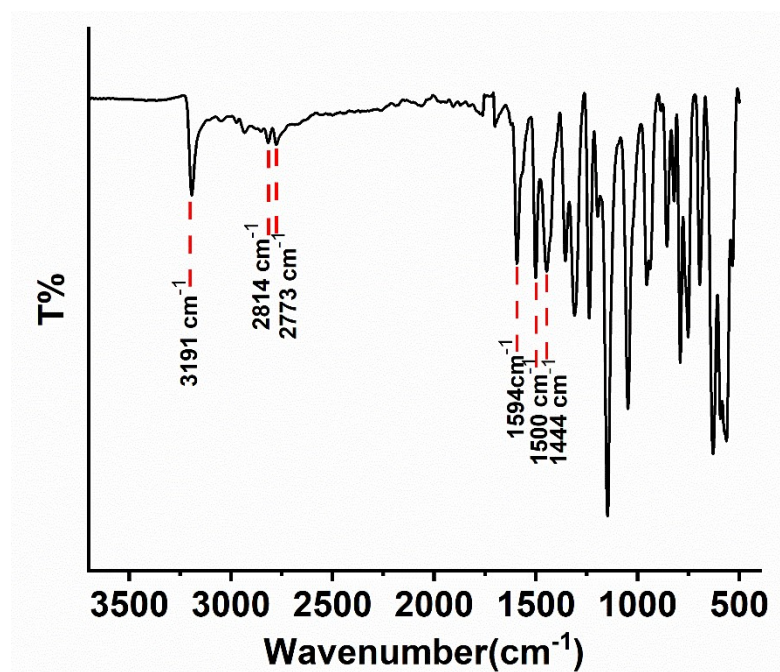

Fig. S4: FTIR spectrum of **DASH**.

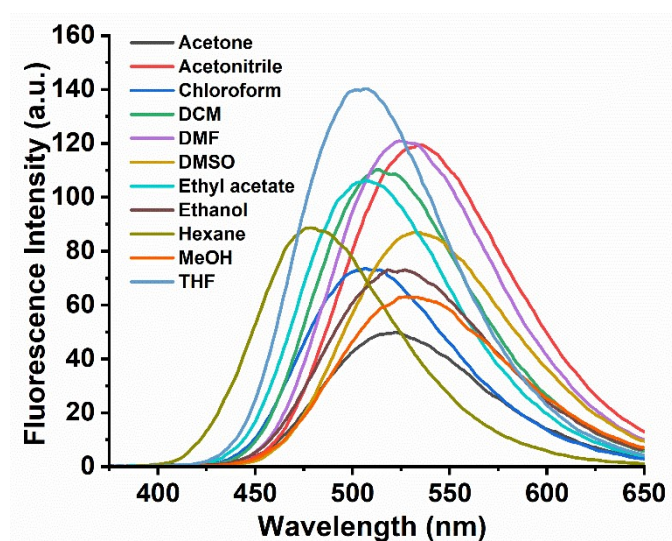

**Fig. S5:** Fluorescence spectra of **DASH** (5.0 mM) in different solvents ( $\lambda_{\text{ex}} = 300 \text{ nm}$ ).

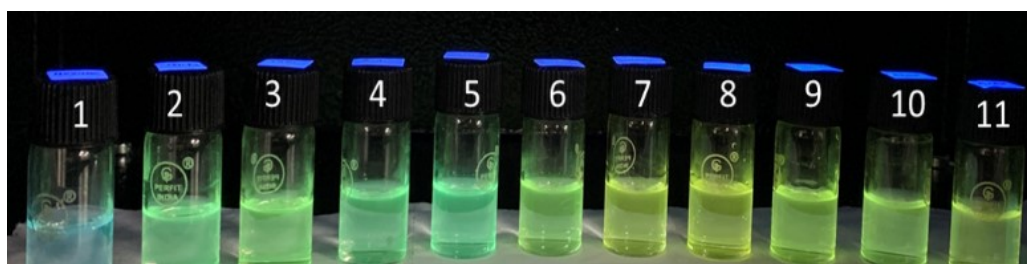

**Fig. S6:** **DASH** (5.0 mM) dissolved in various solvents (1. Hexane 2. Chloroform 3. DCM 4. Ethyl acetate 5. THF 6. Acetone 7. Acetonitrile 8. DMSO 9. DMF 10. Ethanol 11. MeOH) captured under 365 nm UV illumination.

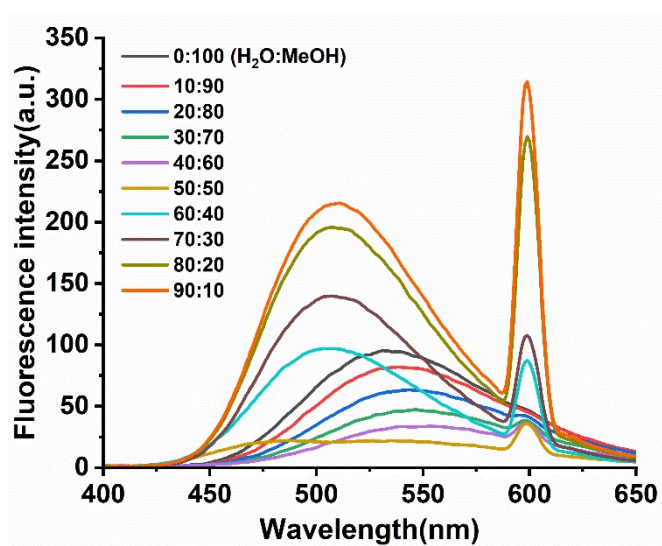

**Fig. S7:** Fluorescence spectra of **DASH** (5.0  $\mu\text{M}$ ) in 0 to 90%  $\text{H}_2\text{O}$  fraction in mixture with MeOH ( $\lambda_{\text{ex}} = 300 \text{ nm}$ ).

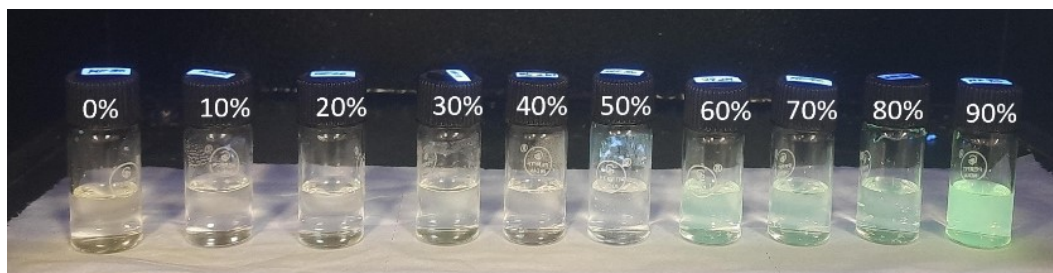

**Fig. S8:** Images of the compound **DASH** (5.0  $\mu\text{M}$ ) in 0 to 90%  $\text{H}_2\text{O}$  fraction mixture with MeOH under 365 nm UV illumination.

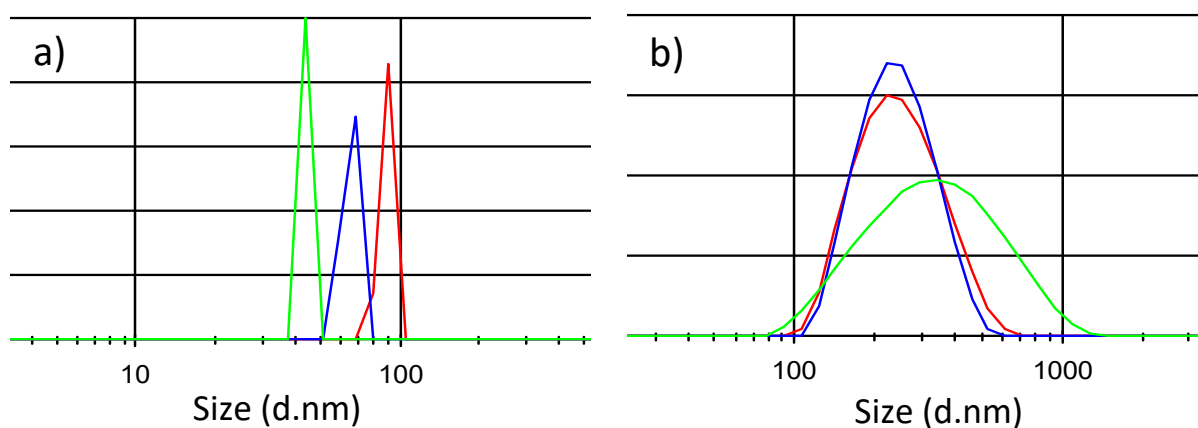

**Fig. S9:** DLS graph of **DASH** in **a)** 100% MeOH; **b)**  $\text{H}_2\text{O}$ :MeOH (90:10).

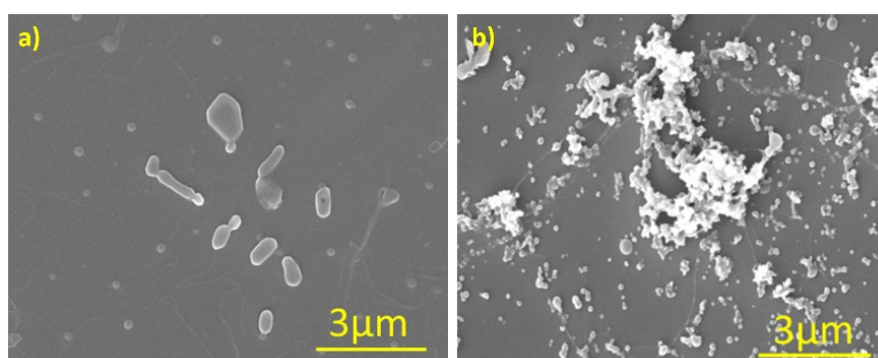

**Fig. S10:** SEM images of **DASH** in **a)** 100% MeOH showing dispersed particles; **b)**  $\text{H}_2\text{O}$ :MeOH (90:10) showing aggregates.



## Quantum yield:

The quantum yield was calculated using the following equation:

$$Q_S = Q_R \frac{I_S A_R \eta_S^2}{I_R A_S \eta_R^2}$$

Using quinine sulphate in 0.1M H<sub>2</sub>SO<sub>4</sub> as a reference ( $Q_R = 0.54$ ), the quantum yield ( $Q_S$ ) for the sample i.e. **DASH** in 100% MeOH and 90:10 (H<sub>2</sub>O:MeOH) was estimated. The absorbance values of reference ( $A_R$ ) and sample ( $A_S$ ) were taken as 0.08. At  $\lambda_{ex} = 306$  nm, by using emission spectra, the integrated area under the curve for the reference ( $I_R$ ) and **DASH** in 100% MeOH ( $I_S$ ) were recorded to be 58959.216 and 10417.565 respectively. While at  $\lambda_{ex} = 341$  nm, the integrated area under the curve for the reference ( $I_R$ ) and **DASH** in 90:10 (H<sub>2</sub>O:MeOH) ( $I_S$ ) were recorded to be 78423.850 and 19168.470 respectively. By using the above equation, the quantum yield of **DASH** in 100% MeOH and 90:10 (H<sub>2</sub>O:MeOH) were calculated to be 0.095 and 0.132 respectively.

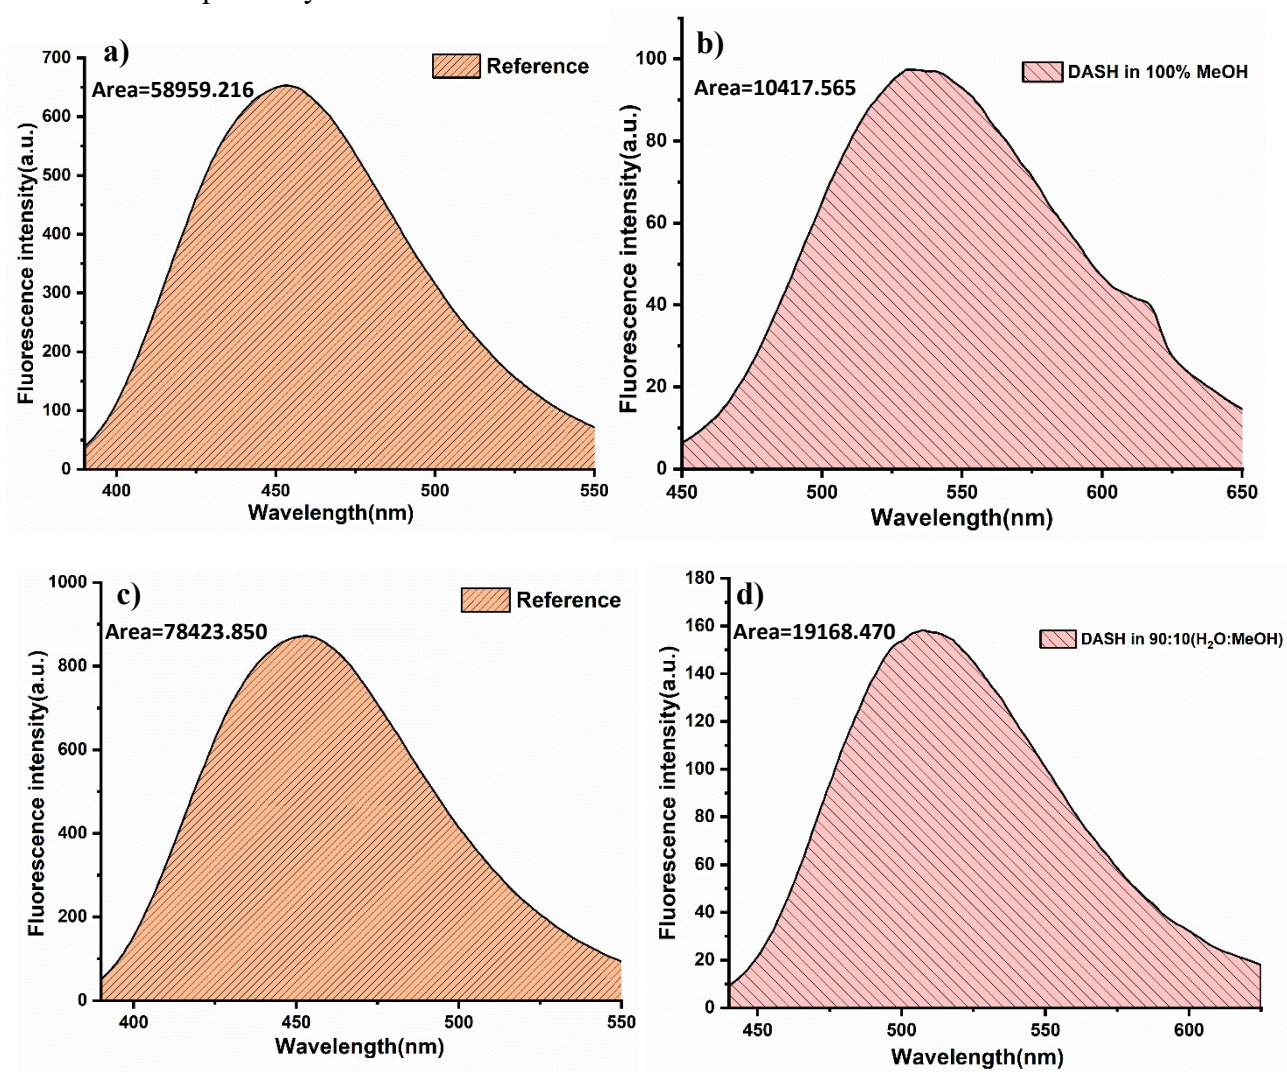

**Fig. S11:** Integrated area under the curve for a) Quinine sulphate, b) **DASH** in 100% MeOH; c) Quinine sulphate and d) **DASH** in 90:10 (H<sub>2</sub>O:MeOH).

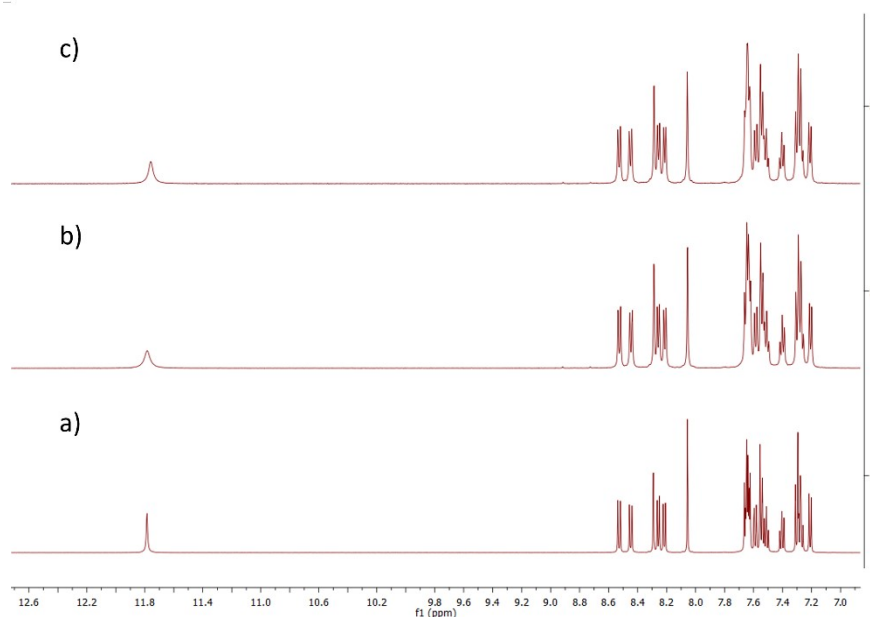

**Fig. S12:**  $^1\text{H}$  NMR spectra of **a)** DASH in  $\text{DMSO-d}_6$ , **b)** DASH upon addition of GBL in  $\text{DMSO-d}_6$ , **c)** DASH upon addition of GVL in  $\text{DMSO-d}_6$ .

#### Limit of detection (LOD):

The limit of detection (LOD) was determined by using the equation:

$$\text{LOD} = 3\delta/K$$

where,  $\delta$  = standard deviation of ten blank measurements, and  $K$  = slope of the calibration plot of analyte concentration vs  $I_0/I$  (ratio of Initial fluorescence intensity of the probe to the final intensity after the addition of analyte).

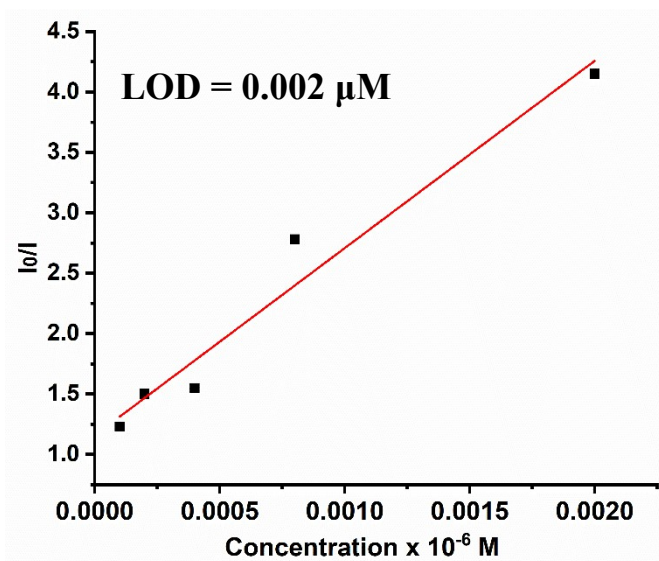

**Fig. S13:** Calibration plot of  $I_0/I$  versus analyte concentration for GBL (gamma-butyrolactone).



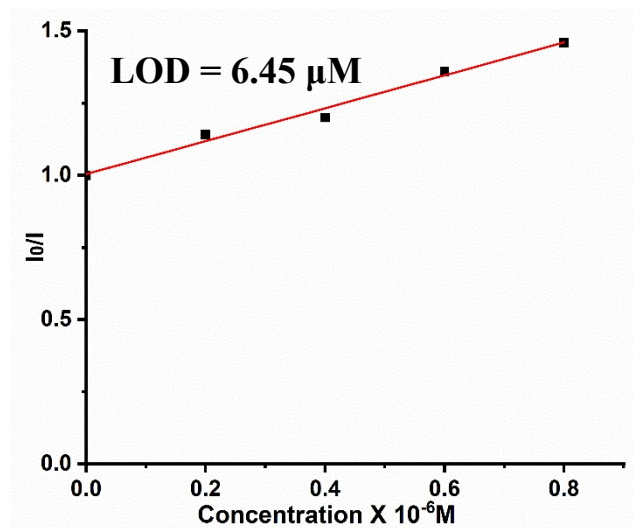

**Fig. S14:** Calibration plot of  $I_0/I$  versus analyte concentration for GVL (gamma-valerolactone).

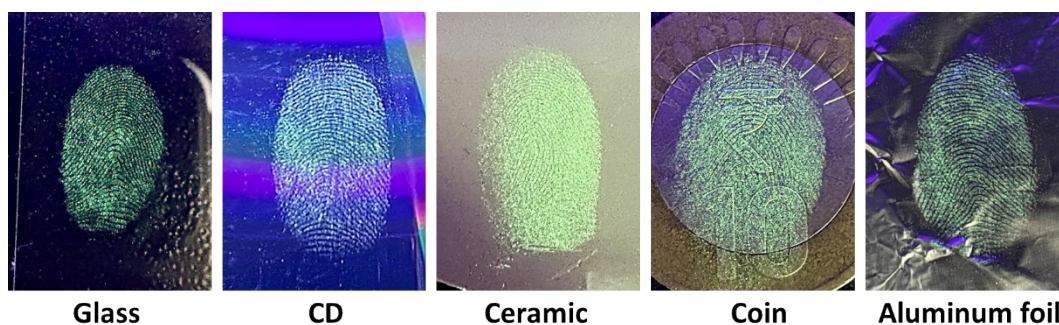

**Fig. S15:** Natural fingerprints (in the absence of sebaceous mark) dusted with 10%DASH@SiO<sub>2</sub> on different substrates under 365nm UV illumination.

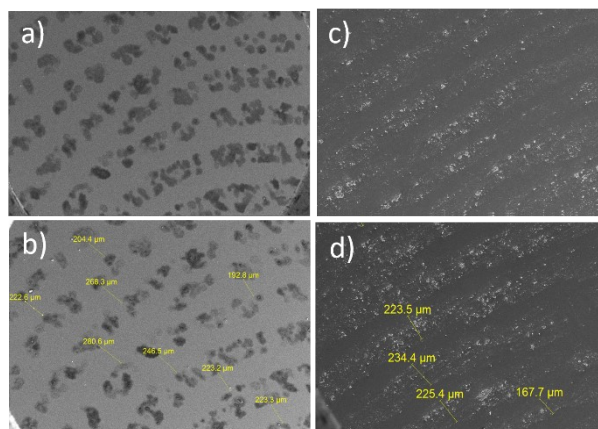

**Fig. S16:** SEM images of **a)** Fingerprint, **b)** Fingerprint showing distance between the ridges, **c)** Fingerprint dusted with 10%DASH@SiO<sub>2</sub>, **d)** Fingerprint showing enhancement in ridge pattern and diameter of ridges.

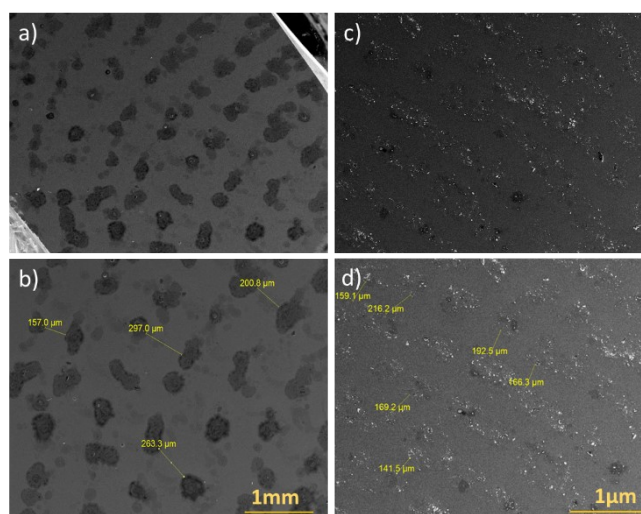

**Fig. S17:** SEM images of **a&b)** Natural fingerprint (in the absence of sebaceous mark), **c&d)** Fingerprint dusted with **10%DASH@SiO<sub>2</sub>**.

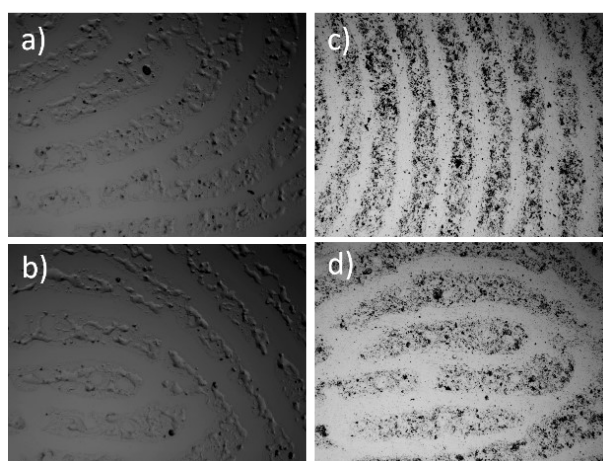

**Fig. S18:** Optical microscope images of **a&b)** Fingerprint and **c&d)** Fingerprint dusted with **10%DASH@SiO<sub>2</sub>**.

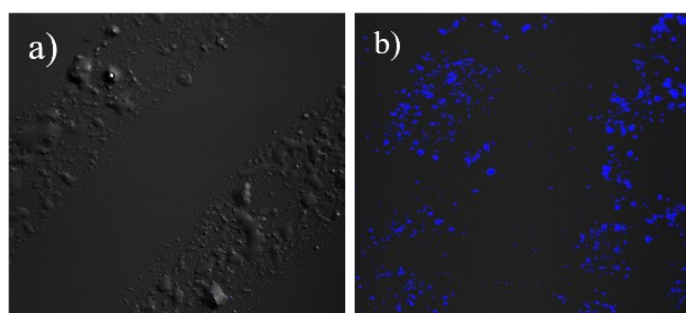

**Fig. S19:** Confocal images of **a)** Fingerprint and **b)** Fingerprint dusted with **10%DASH@SiO<sub>2</sub>**.



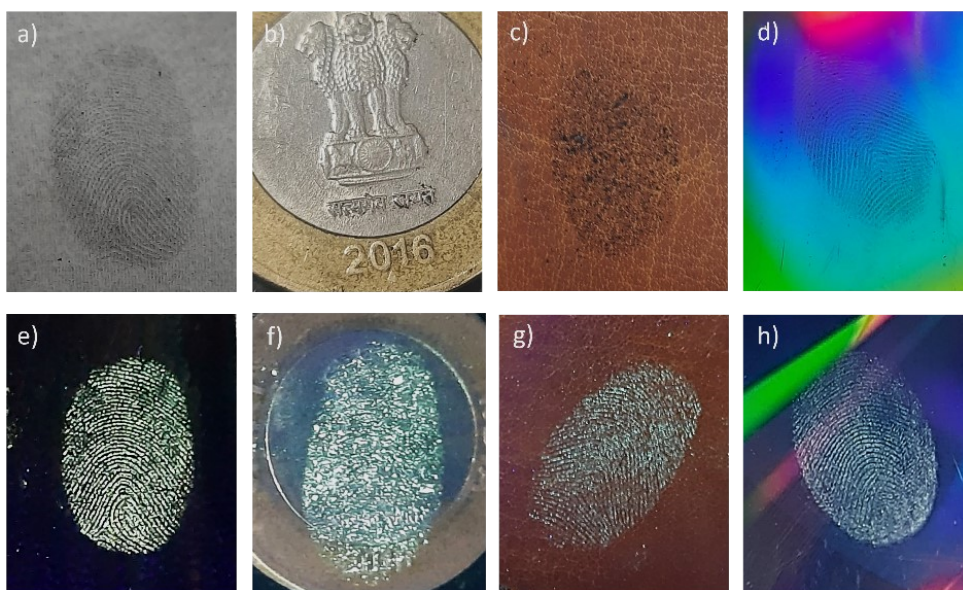

**Fig. S20:** Comparison of Fingerprint developed using commercially used magnetic powder (a to d) and **10%DASH@SiO<sub>2</sub>** (e to h) on a&e) glass, b&f) coin, c&g) leather, d&h) CD respectively.

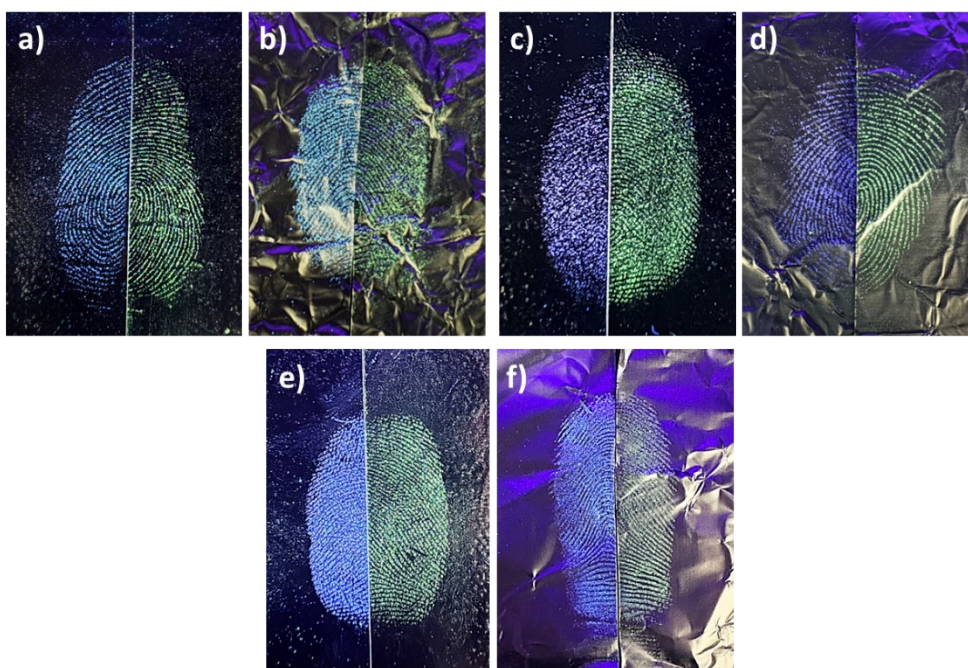

**Fig. S21:** Split fingerprints for comparison of a&b) Pyrene and **10%DASH@SiO<sub>2</sub>**, c&d) 1,8 naphthalimide and **10%DASH@SiO<sub>2</sub>**, e&f) Anthracene and **10%DASH@SiO<sub>2</sub>** on glass and aluminum foil substrates.



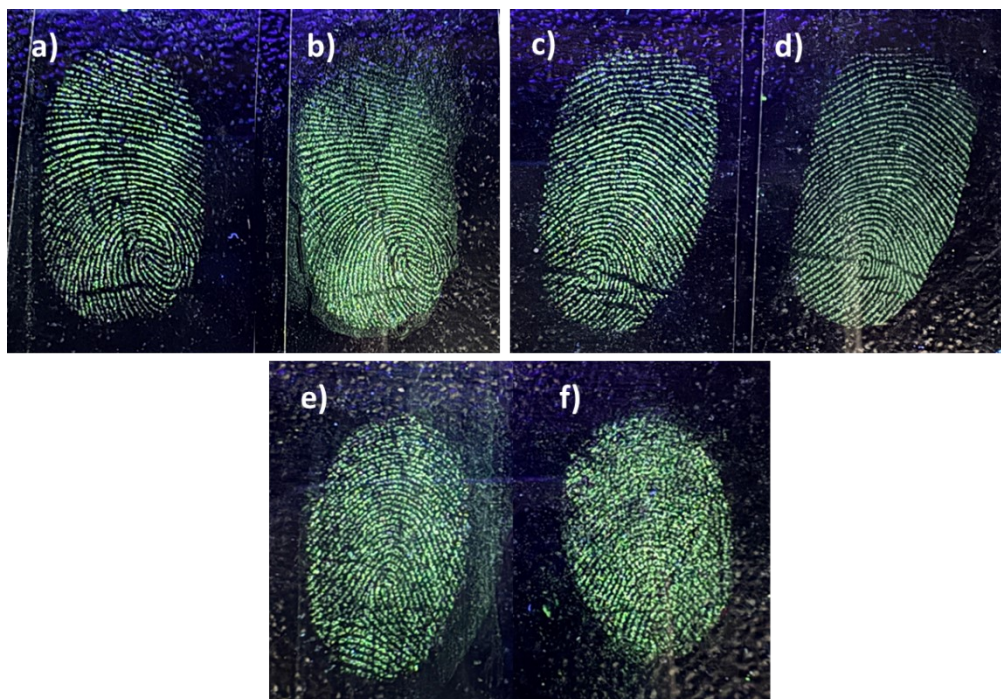

**Fig. S22:** Effect of 10%DASH@SiO<sub>2</sub> on moisture laden and thermally exposed (80 °C) fingerprints: **a), c) & e)** Natural Fingerprint (in the absence of sebaceous mark) dusted with 10%DASH@SiO<sub>2</sub>, **b), d) & f)** Natural Fingerprint (in the absence of sebaceous mark) exposed to moisture and heat, then dusted with 10%DASH@SiO<sub>2</sub>.

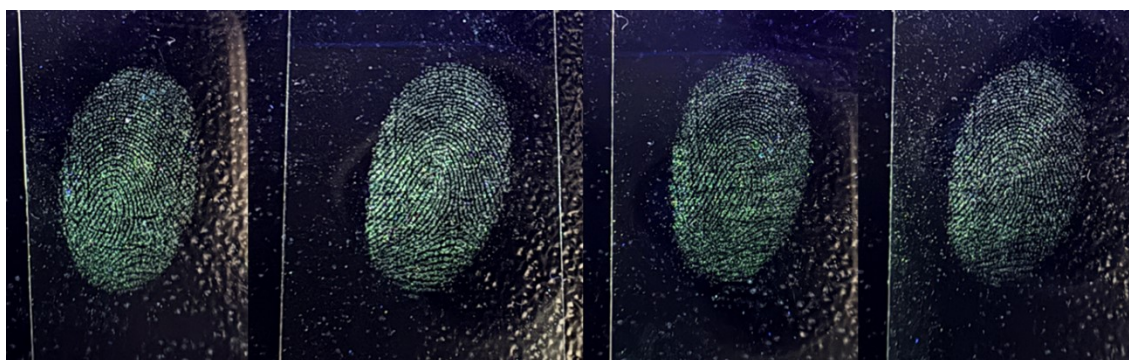

**Fig. S23:** Depletion series of Natural fingerprints (in the absence of sebaceous mark) visualized using 10%DASH@SiO<sub>2</sub> under 365nm UV illumination.

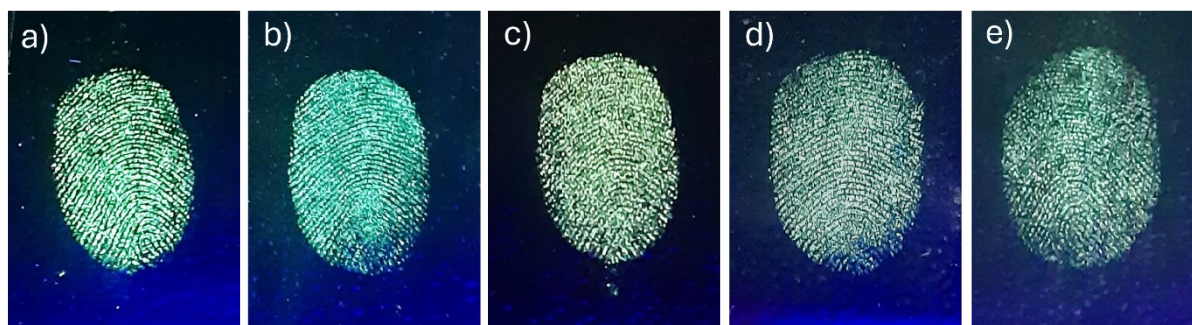

**Fig. S24:** Fingerprints developed with 10%DASH@SiO<sub>2</sub> after **a)** 1 day **b)** 7 days **c)** 14 days **d)** 21 days **e)** 28 days.
